# Supplementary material
Source: publisher figshare collection journal article supplement (https://gsajournals.figshare.com/ndownloader/files/27925560)
Supplement: Supplementary file 1 [file 27925560]

|  | Diagnostic PCRs using primer pair | | | | | |
| --- | --- | --- | --- | --- | --- | --- |
| 1+4,  5.1 kb amplicon | 1+4,  1.5 kb amplicon | 1+2 | 3+4 | 2+7 | 3+6 |
| Number of clones positive | 26 | 26 | 5 | 4 | 9 | 15 |

**Table S1. Summary of diagnostic PCRs employed to detect accurate CRISPR based homologous repair at the 99F8 locus in S2R+ single cell clones.**

PCRs were performed with the indicated primer pairs (Figs. 2 & 3). The number of clones that were positive for each of the PCR reactions with the corresponding primer pairs are indicated. For the primer pair 1 and 4, the expected amplicon size if successful homologous recombination had occurred would be 5 kb, while the unmodified locus would yield an amplicon of 1.5 kb.
